# Supplementary material for: Single-Trial Cognitive Stress Classification Using Portable Wireless Electroencephalography
Source: Sensors (Basel). 2019 Jan 25;19(3):499. doi: 10.3390/s19030499 (PMC6387350; doi:10.3390/s19030499)
Supplement: Supplementary file 1 [file sensors-19-00499-s001.zip]

Archive with 9 entries (9 files):
- FigureS1.tif
- FigureS2.tif
- FigureS3.tif
- FigureS4.tif
- FigureS5.tif
- FigureS6.tif
- FigureS7.tif
- TableS1.tif
- sensors-407833_Second_revision_supplementary_material.pdf
